CORRECTION

# Correction: Transcription Factors Encoded on Core and Accessory Chromosomes of *Fusarium oxysporum* Induce Expression of Effector Genes

The *PLOS Genetics* Staff

## Notice of Republication

This article was republished on December 6, 2016, to correct errors caused by the incorrect resizing of Fig 5 and Fig 7 during the typesetting process, and a correction has also been made in the Results section, under the sub-heading “Induction of effector gene expression mediated by *aTF1* overexpression is Sge1 dependent”. The sentence “Also, deletion of *SGE1* resulted in loss of pathogenicity in both WT and in *aTF1* overexpressing strains (S12 Fig).” has been moved from the end of the Results section to the end of the penultimate paragraph of the Results section.

The publisher apologizes for the errors. Please download this article again to view the correct version. The originally published, uncorrected article and the republished, corrected articles are provided here for reference.

## Supporting Information

**S1 File. Originally published, uncorrected article.**  
(PDF)

**S2 File. Republished, corrected article.**  
(PDF)

## Reference

1. van der Does HC, Fokkens L, Yang A, Schmidt SM, Langereis L, Lukasiewicz JM, et al. (2016) Transcription Factors Encoded on Core and Accessory Chromosomes of *Fusarium oxysporum* Induce Expression of Effector Genes. *PLoS Genet* 12(11): e1006401. doi:[10.1371/journal.pgen.1006401](https://doi.org/10.1371/journal.pgen.1006401) PMID: [27855160](https://pubmed.ncbi.nlm.nih.gov/27855160/)

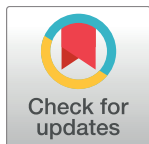

## OPEN ACCESS

**Citation:** The *PLOS Genetics* Staff (2016) Correction: Transcription Factors Encoded on Core and Accessory Chromosomes of *Fusarium oxysporum* Induce Expression of Effector Genes. *PLoS Genet* 12(12): e1006527. doi:[10.1371/journal.pgen.1006527](https://doi.org/10.1371/journal.pgen.1006527)

**Published:** December 29, 2016

**Copyright:** © 2016 The PLOS Genetics Staff. This is an open access article distributed under the terms of the [Creative Commons Attribution License](https://creativecommons.org/licenses/by/4.0/), which permits unrestricted use, distribution, and reproduction in any medium, provided the original author and source are credited.
